# Supplementary material for: Sex-specific transgenerational plasticity: developmental temperatures of mothers and fathers have different effects on sons and daughters
Source: Oxford University Press journal article supplement (doi:10.1242/jeb.245798), 2023-06-09
Supplement: jeb245798supp.pdf [file jeb245798supp.pdf]

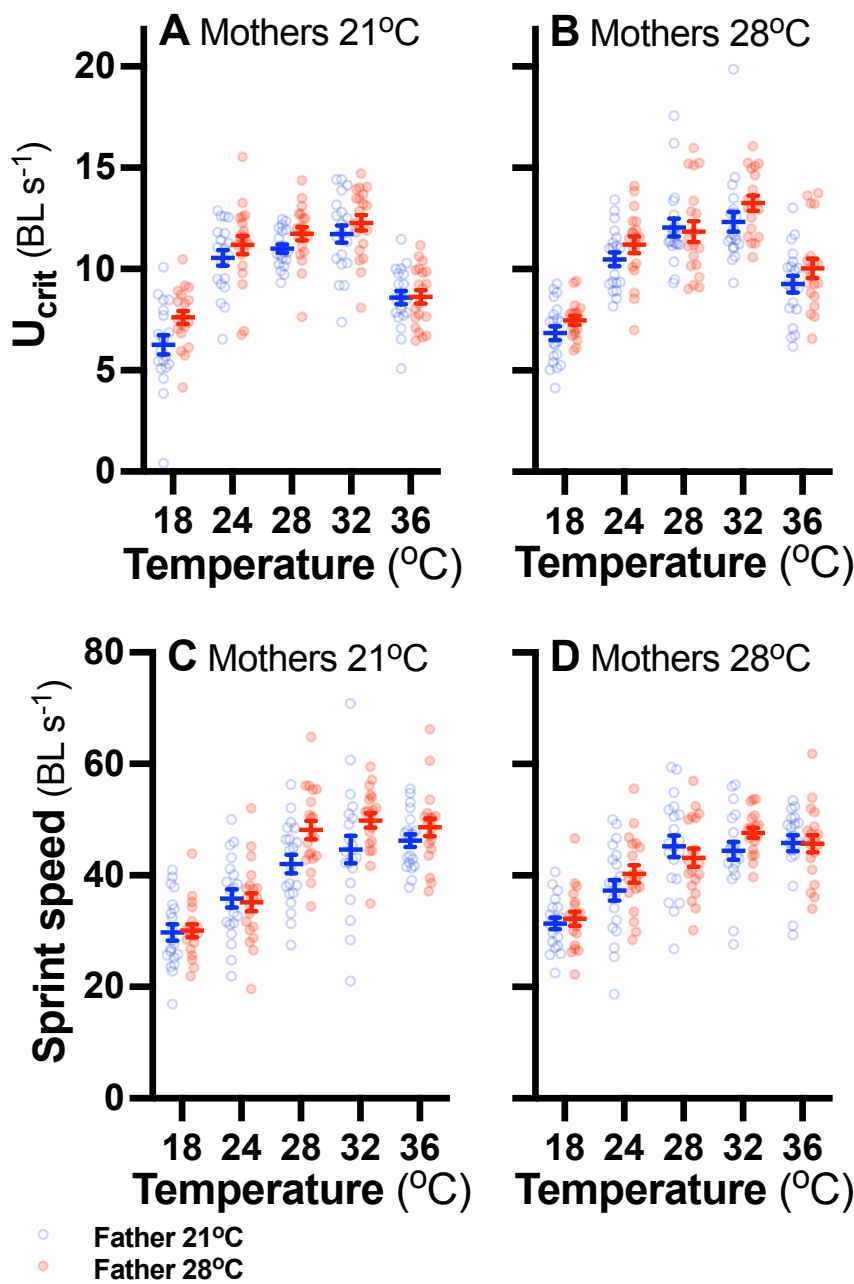

**Fig. S1.** Swimming performance of female offspring. Full data set of  $U_{crit}$  (A, B) and sprint (C, D) performance of female offspring from mothers raised at 21°C (left panels) and at 28°C (right panels), and matched with fathers raised at 21°C (open blue circles) and 28°C (closed red circles). Means  $\pm$  s.e. are shown as horizontal and vertical lines, respectively, and data points from individual fish are shown (n = 18-20 fish per treatment).

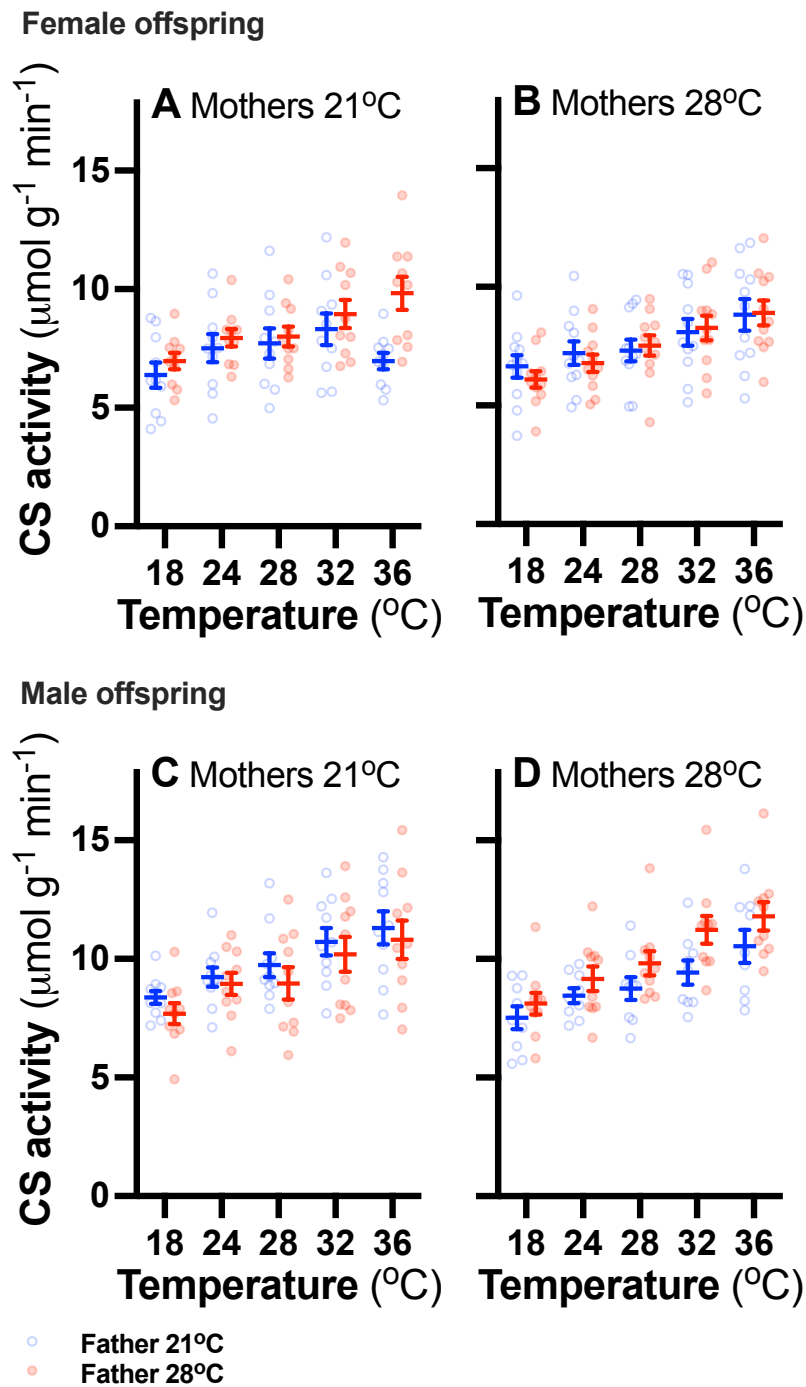

**Fig. S2.** Citrate synthase activity. Thermal performance curves of female (A, B) and male (C, D) offspring from mothers raised at 21°C (left panels) and 28°C (right panels), and matched with fathers raised at 21°C (open blue circles) and 28°C (filled red circles). Citrate synthase (CS) activity, an indicator of mitochondrial abundance, was affected by interactions between offspring sex, parental developmental temperatures, and acute test temperature (Table S2). Means  $\pm$  s.e. and data points from individual fish are shown ( $n = 9-11$  fish per treatment).

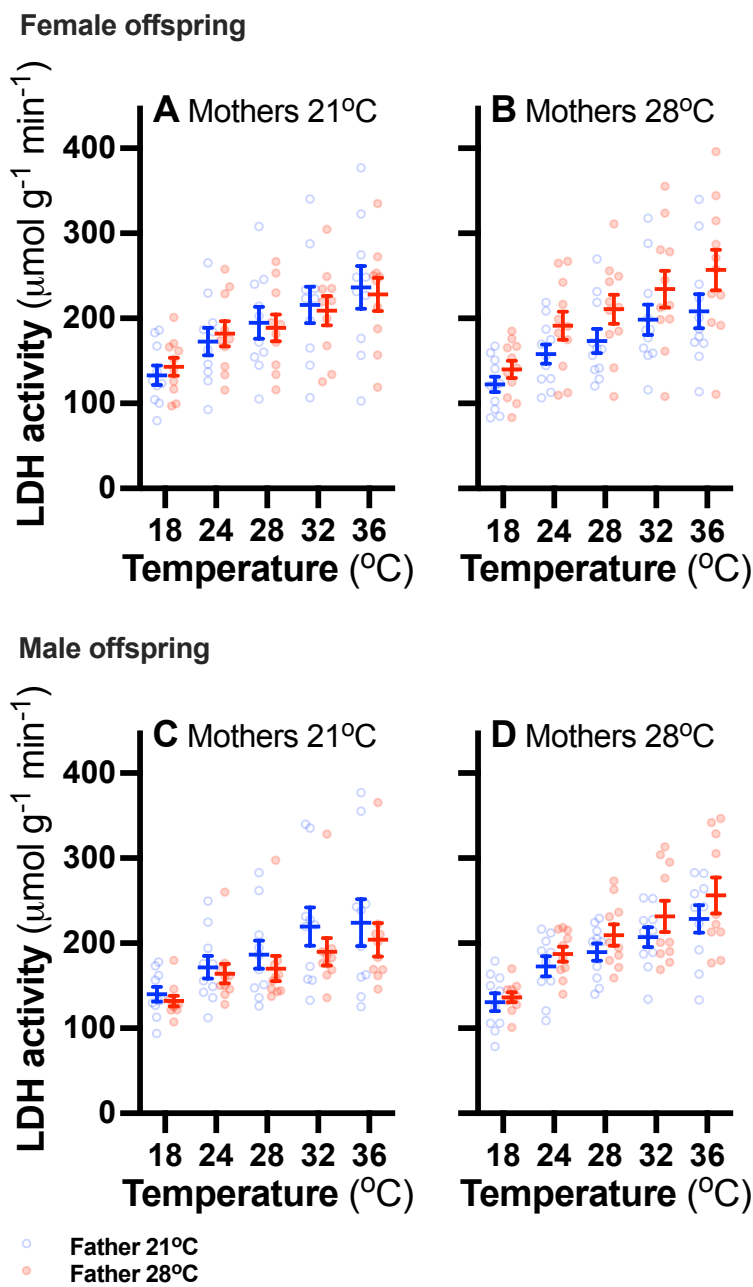

**Fig. S3.** Lactate dehydrogenase activity. Thermal performance curves of female (A, B) and male (C, D) offspring from mothers raised at 21°C (left panels) and 28°C (right panels), and matched with fathers raised at 21°C (open blue circles) and 28°C (filled red circles). Lactate dehydrogenase (LDS) activity was affected by interactions between offspring sex, parental developmental temperatures, and acute test temperature (Table S2). Means  $\pm$  s.e. and data points from individual fish are shown ( $n = 9-11$  fish per treatment).

**Table S1.** Results from the full model permutational analysis of body mass and length. Probabilities from analyses of independent factors (mother T and father T = temperatures at which mothers and fathers were raised, respectively; sex = offspring sex), and the random factor parent family (parent id; p-values and % of total variance) are shown. Residual df = 153.

| Source                | Length           | Mass             |
|-----------------------|------------------|------------------|
| sex                   | <0.0001          | <0.0001          |
| mother T              | <0.0001          | <0.0001          |
| father T              | <0.0001          | 0.48             |
| mother T*father T     | 0.12             | 0.28             |
| sex*mother T          | 0.21             | 0.38             |
| sex*father T          | 0.0044           | 1                |
| sex*mother T*father T | 0.15             | 0.20             |
| parent id             | <0.0001<br>27.0% | <0.0001<br>38.0% |

**Table S2.** Results from the full model permutational analysis of swimming performance and enzyme activities. Probabilities from analyses of independent factors (mother T and father T = temperatures at which mothers and fathers were raised, respectively; sex = offspring sex; test T = acute test temperature), and the random factor parent family (parent id; p-values and % of total variance) are shown. The four-way interaction was not included in the analysis. Individual id was used as a random factor; within residual df = 620 and 296 for swimming performance and enzyme activities, respectively.

| Source                   | U <sub>crit</sub> | Sprint           | CS               | LDH              |
|--------------------------|-------------------|------------------|------------------|------------------|
| sex                      | 0.015             | 0.23             | <0.0001          | 0.90             |
| mother T                 | 0.22              | 0.016            | 0.27             | 0.47             |
| father T                 | 0.00040           | 0.13             | <0.0001          | <0.0001          |
| test T                   | <0.0001           | <0.0001          | <0.0001          | <0.0001          |
| sex*mother T             | 0.24              | 0.33             | 0.35             | 0.92             |
| sex*father T             | 0.64              | 0.55             | <0.0001          | <0.0001          |
| sex*testT                | 0.045             | 0.27             | 0.0038           | 1                |
| mother T*father T        | 0.00020           | 0.0084           | 0.68             | 0.17             |
| mother T*test T          | 0.019             | <0.0001          | 0.98             | 0.064            |
| fatherT*test T           | 0.0020            | 0.33             | 0.078            | 0.66             |
| sex*mother T*father T    | 1                 | 0.37             | 0.034            | 0.58             |
| sex*mother T*test T      | 0.72              | 0.51             | 1                | 0.61             |
| sex*father T*test T      | 0.64              | 1                | 0.99             | 1                |
| mother T*father T*test T | <0.0001           | 1                | 0.18             | 0.042            |
| parent id                | <0.0001<br>36.8%  | <0.0001<br>11.3% | <0.0001<br>33.3% | <0.0001<br>21.7% |
